# Supplementary material for: RNA-binding protein RBM3 prevents NO-induced apoptosis in human neuroblastoma cells by modulating p38 signaling and miR-143
Source: PubMed Central journal article supplement (PMC5278414; doi:10.1038/srep41738), 2017-01-30
Supplement: srep41738-s1.pdf [file srep41738-s1.pdf]

# **RNA-binding protein RBM3 prevents NO-induced apoptosis in human neuroblastoma cells by modulating p38 signaling and miR-143**

Hai-Jie Yang<sup>1,2,3\*</sup>, Fei Ju<sup>1,2</sup>, Xin-Xin Guo<sup>1,2</sup>, Shuang-Ping Ma<sup>1</sup>, Lei Wang<sup>1</sup>, Bin-Feng Cheng<sup>1</sup>, Rui-Juan Zhuang<sup>1</sup>, Bin-Bin Zhang<sup>1</sup>, Xiang Shi<sup>1</sup>, Zhi-Wei Feng<sup>2\*</sup>, Mian Wang<sup>1,2</sup>

<sup>1</sup>School of Life Science and Technology, Xinxiang Medical University, Xinxiang 453003, China

<sup>2</sup>Henan Collaborative Innovation Center of Molecular Diagnosis and Laboratory Medicine, Xinxiang Medical University, Xinxiang 453003, China

<sup>3</sup>Henan Key Lab of Biological Psychiatry, Second Affiliated Hospital of Xinxiang Medical University, Xinxiang 453003, China

\*Address correspondence to:

Dr. Hai-Jie Yang or Dr. Zhi-Wei Feng

601 Jinsui Road, Xinxiang, Henan, 453003, China.

e-mail: [hjyang\\_wmd@hotmail.com](mailto:hjyang_wmd@hotmail.com) (H. J. Yang)

[xxyxy\\_fzw@163.com](mailto:xxyxy_fzw@163.com) (Z. W. Feng)

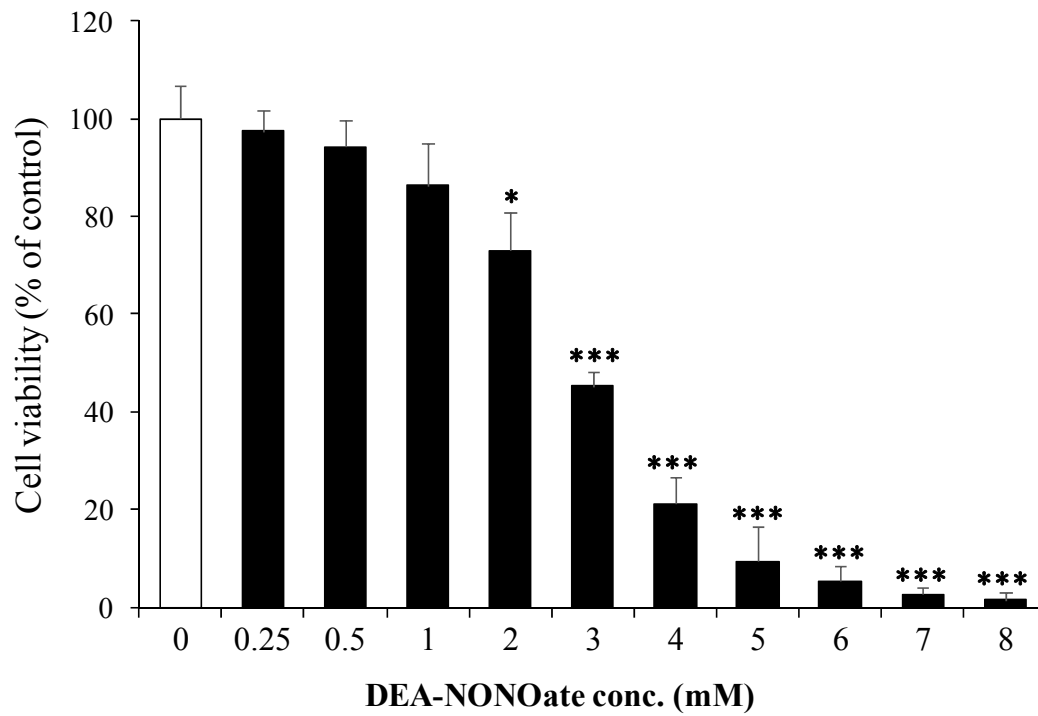

**Figure S1. DEA NONOate induces a dose-dependent cytotoxicity in SH-SY5Y neuroblastoma cells.** Cells were treated various concentrations of DEA NONOate for 16 h, and cell viability was assessed by MTT assay. \* $P < 0.05$  and \*\*\* $P < 0.001$  versus control group. All results shown are representative of three independent experiments.

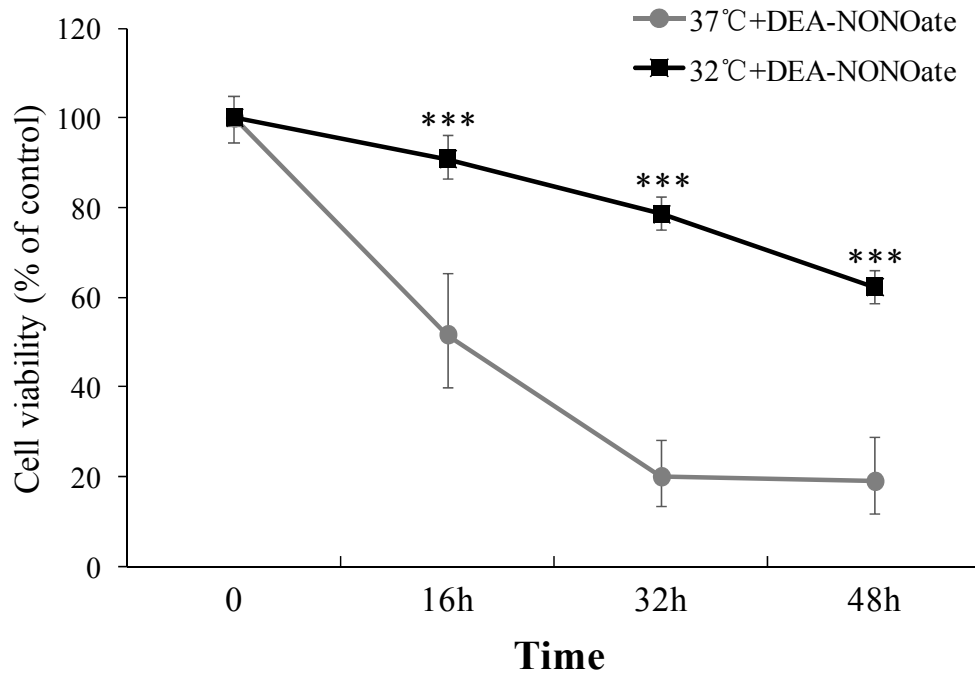

**Figure S2. DEA NONOate induces a time-dependent cytotoxicity in SH-SY5Y cells and mild hypothermia (32°C) reduces its cytotoxicity.** SH-SY5Y cells were pre-cultured under normothermic (37°C) or mild hypothermic (32°C) conditions for 1 d and treated with DEA NONOate (3 mM) for 16–48 h, and then cell viability was assessed by MTT assay. \*\*\* $P < 0.001$  versus control group.

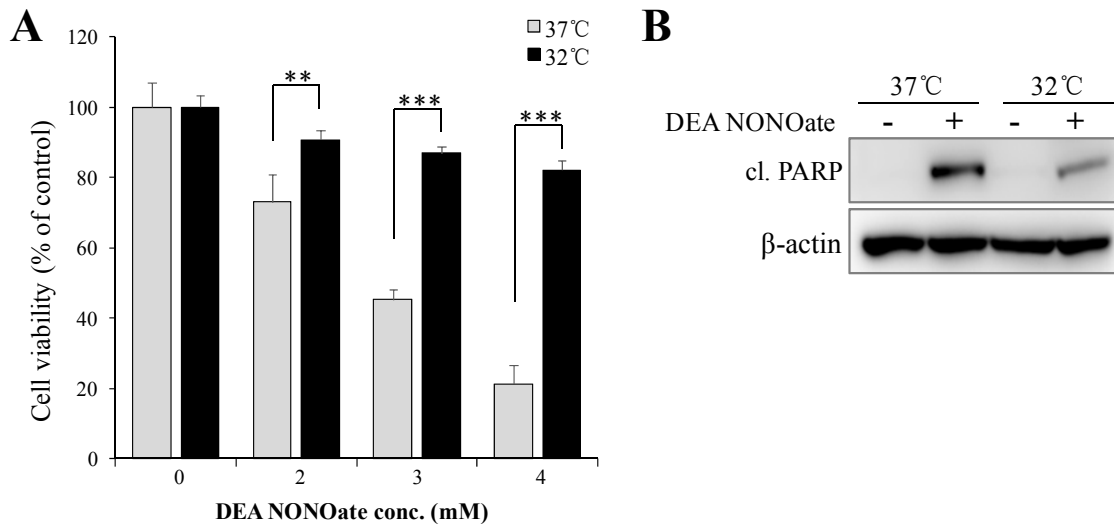

**Figure S3. Mild hypothermia prevents SH-SY5Y neuroblastoma cells from DEA NONOate-induced apoptosis.** SH-SY5Y cells were pre-cultured under normothermic (37°C) or mild hypothermic (32°C) conditions for 1 d and treated with DEA NONOate (3 mM) for 16 h. (A) The cell viability was assessed by MTT assay, and (B) cleaved (cl.) PARP was detected by Western blotting.  $\beta$ -actin served as a loading control.  $**P < 0.01$  and  $***P < 0.001$  versus control group.

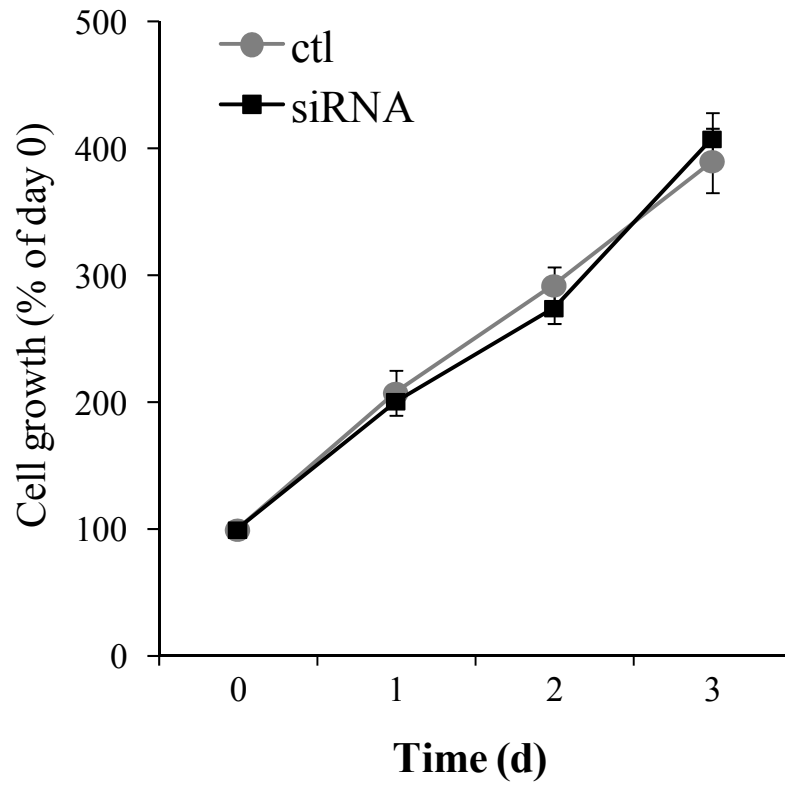

**Figure S4. Effect of siRNAs on cell growth of SH-SY5Y under hypothermic conditions.** 2 d post transfection of RBM3 siRNA or scramble siRNA (ctl), SH-SY5Y cells were continued to culture at 32°C for 1–3 d, and MTT assay was performed to evaluate cytotoxicity of siRNAs under hypothermic conditions.

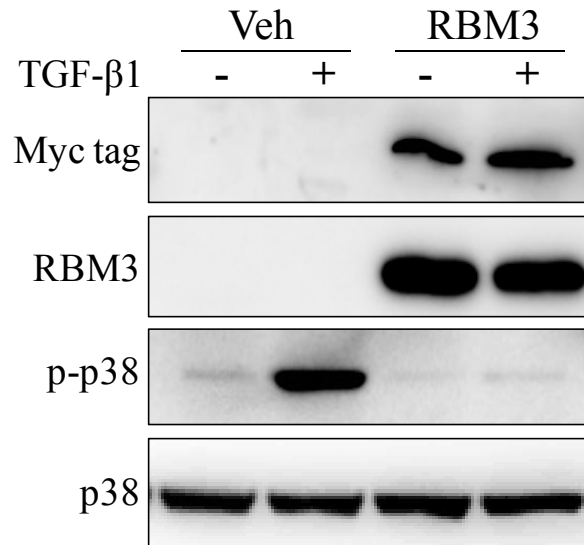

**Figure S5. RBM3 inhibits TGF- $\beta$ 1-induced p38 activation.** SH-SY5Y cells were transfected with plasmid pXJ40-myc (Veh) or pXJ40-myc-RBM3 (RBM3) for 2 d, and then treated with TGF- $\beta$ 1 (5 ng/mL) for 30 min. Western blotting was performed to detect the levels of phosphorylated p38 (p-p38). The total p38 served as a loading control.
